# Supplementary material for: Lacustrine Urban Blue Spaces: Low Availability and Inequitable Distribution in the Most Populated Cities in Mexico
Source: MDPI journal article supplement (doi:10.3390/land12010228), 2023-01-11
Supplement: s1 [file s1]

**Table S1.** Estimated lacustrine blue spaces indicators in Mexican cities for 2021.

| ENTITY NAME         | CITY NAME                      | TOTAL POPULATION | CITY AREA (Km <sup>2</sup> ) | POPULATION DENSITY | BLUE SPACES NUMBER | BLUE SPACES SURFACE (m <sup>2</sup> ) | m <sup>2</sup> OF BLUE SPACES PER INHABITANT | BLUE SPACES' SURFACE PERCENT OF THE CITY AREA | NUMBER OF ARTIFICIAL BLUE SPACES | NUMBER OF NATURAL BLUE SPACES | NUMBER OF NOT IDENTIFIED BLUE SPACES | SIMPLIFIED HYDROLOGICAL REGION |
|---------------------|--------------------------------|------------------|------------------------------|--------------------|--------------------|---------------------------------------|----------------------------------------------|-----------------------------------------------|----------------------------------|-------------------------------|--------------------------------------|--------------------------------|
| Aguascalientes      | Aguascalientes                 | 863893           | 120.4                        | 7177               | 15                 | 286094                                | 0.331                                        | 0.238                                         | 11                               | 3                             | 1                                    | CENTER                         |
| Baja California     | Ensenada                       | 330652           | 80.0                         | 4133               | 3                  | 72082                                 | 0.218                                        | 0.090                                         | 0                                | 3                             | 0                                    | B. CALIFORNIA                  |
| Baja California     | Mexicali                       | 854186           | 202.3                        | 4223               | 7                  | 156643                                | 0.183                                        | 0.077                                         | 5                                | 1                             | 1                                    | B. CALIFORNIA                  |
| Baja California     | Tijuana                        | 1810645          | 295.0                        | 6138               | 4                  | 56194                                 | 0.031                                        | 0.019                                         | 4                                | 0                             | 0                                    | B. CALIFORNIA                  |
| Baja California     | Playas de Rosarito             | 100660           | 36.2                         | 2782               | 2                  | 119                                   | 0.001                                        | 0.000                                         | 2                                | 0                             | 0                                    | B. CALIFORNIA                  |
| Baja California Sur | La Paz                         | 250141           | 78.6                         | 3183               | 4                  | 46680                                 | 0.187                                        | 0.059                                         | 4                                | 0                             | 0                                    | B. CALIFORNIA                  |
| Baja California Sur | San José del Cabo              | 136285           | 54.8                         | 2487               | 15                 | 105110                                | 0.771                                        | 0.192                                         | 15                               | 0                             | 0                                    | B. CALIFORNIA                  |
| Baja California Sur | Cabo San Lucas                 | 202694           | 61.8                         | 3282               | 16                 | 99075                                 | 0.489                                        | 0.160                                         | 14                               | 0                             | 2                                    | B. CALIFORNIA                  |
| Campeche            | San Francisco de Campeche      | 249623           | 52.1                         | 4789               | 2                  | 59533                                 | 0.238                                        | 0.114                                         | 2                                | 0                             | 0                                    | YUCATAN                        |
| Campeche            | Ciudad del Carmen              | 191238           | 35.5                         | 5388               | 13                 | 104222                                | 0.545                                        | 0.294                                         | 4                                | 2                             | 7                                    | GULF                           |
| Coahuila            | Ciudad Acuña                   | 160225           | 41.2                         | 3888               | 1                  | 1140                                  | 0.007                                        | 0.003                                         | 0                                | 0                             | 1                                    | NORTH                          |
| Coahuila            | Monclova                       | 237169           | 71.7                         | 3309               | 15                 | 38473                                 | 0.162                                        | 0.054                                         | 9                                | 0                             | 6                                    | NORTH                          |
| Coahuila            | Piedras Negras                 | 173959           | 53.7                         | 3239               | 5                  | 14497                                 | 0.083                                        | 0.027                                         | 3                                | 1                             | 1                                    | NORTH                          |
| Coahuila            | Ramos Arizpe                   | 114010           | 41.1                         | 2773               | 1                  | 12759                                 | 0.112                                        | 0.031                                         | 1                                | 0                             | 0                                    | NORTH                          |
| Coahuila            | Saltillo                       | 864431           | 193.0                        | 4480               | 22                 | 81544                                 | 0.094                                        | 0.042                                         | 20                               | 0                             | 2                                    | NORTH                          |
| Coahuila            | Torreón                        | 690193           | 151.3                        | 4561               | 33                 | 135886                                | 0.197                                        | 0.090                                         | 32                               | 0                             | 1                                    | NORTH                          |
| Colima              | Colima                         | 146965           | 41.4                         | 3550               | 3                  | 6360                                  | 0.043                                        | 0.015                                         | 3                                | 0                             | 0                                    | PACIFICO                       |
| Colima              | Manzanillo                     | 159853           | 47.8                         | 3343               | 13                 | 118291                                | 0.74                                         | 0.247                                         | 9                                | 2                             | 2                                    | PACIFICO                       |
| Colima              | Ciudad de Villa de Álvarez     | 147496           | 24.3                         | 6060               | 1                  | 2315                                  | 0.016                                        | 0.010                                         | 1                                | 0                             | 0                                    | PACIFICO                       |
| Chiapas             | Comitán de Domínguez           | 113479           | 33.8                         | 3357               | 9                  | 5235                                  | 0.046                                        | 0.015                                         | 6                                | 0                             | 3                                    | GULF                           |
| Chiapas             | San Cristóbal de las Casas     | 183509           | 35.7                         | 5140               | 6                  | 27362                                 | 0.149                                        | 0.077                                         | 5                                | 0                             | 1                                    | GULF                           |
| Chiapas             | Tapachula de Córdova y Ordóñez | 217550           | 45.8                         | 4753               | 3                  | 9599                                  | 0.044                                        | 0.021                                         | 1                                | 0                             | 2                                    | PACIFICO                       |
| Chiapas             | Tuxtla Gutiérrez               | 578830           | 131.6                        | 4400               | 9                  | 9441                                  | 0.016                                        | 0.007                                         | 7                                | 0                             | 2                                    | GULF                           |
| Chihuahua           | Cuauhtémoc                     | 135586           | 54.5                         | 2489               | 4                  | 10798                                 | 0.08                                         | 0.020                                         | 2                                | 0                             | 2                                    | NORTH                          |
| Chihuahua           | Chihuahua                      | 925762           | 280.4                        | 3302               | 20                 | 303926                                | 0.328                                        | 0.108                                         | 16                               | 0                             | 4                                    | NORTH                          |
| Chihuahua           | Delicias                       | 128548           | 34.3                         | 3750               | 3                  | 2554                                  | 0.02                                         | 0.007                                         | 3                                | 0                             | 0                                    | NORTH                          |
| Chihuahua           | Hidalgo del Parral             | 113843           | 32.1                         | 3545               | 3                  | 9354                                  | 0.082                                        | 0.029                                         | 0                                | 0                             | 3                                    | NORTH                          |
| Chihuahua           | Juárez                         | 1501551          | 357.4                        | 4201               | 51                 | 288450                                | 0.192                                        | 0.081                                         | 42                               | 0                             | 9                                    | NORTH                          |
| Ciudad de México    | Azcapotzalco                   | 432205           | 33.3                         | 12970              | 1                  | 14916                                 | 0.035                                        | 0.045                                         | 1                                | 0                             | 0                                    | GULF                           |
| Ciudad de México    | Coyoacán                       | 614447           | 53.6                         | 11459              | 8                  | 38388                                 | 0.062                                        | 0.072                                         | 2                                | 0                             | 6                                    | GULF                           |
| Ciudad de México    | Cuajimalpa de Morelos          | 186693           | 26.4                         | 7069               | 10                 | 18566                                 | 0.099                                        | 0.070                                         | 10                               | 0                             | 0                                    | GULF                           |
| Ciudad de México    | Gustavo A. Madero              | 1173351          | 87.4                         | 13428              | 2                  | 196110                                | 0.167                                        | 0.224                                         | 1                                | 0                             | 1                                    | GULF                           |
| Ciudad de México    | Iztacalco                      | 404695           | 23.0                         | 17624              | 1                  | 37834                                 | 0.093                                        | 0.165                                         | 1                                | 0                             | 0                                    | GULF                           |
| Ciudad de México    | Iztapalapa                     | 1835486          | 112.4                        | 16325              | 3                  | 90151                                 | 0.049                                        | 0.080                                         | 2                                | 0                             | 1                                    | GULF                           |
| Ciudad de México    | La Magdalena Contreras         | 246428           | 18.1                         | 13583              | 0                  | 0                                     | 0                                            | 0.000                                         | 0                                | 0                             | 0                                    | GULF                           |
| Ciudad de México    | Álvaro Obregón                 | 759003           | 69.4                         | 10936              | 8                  | 30263                                 | 0.04                                         | 0.044                                         | 3                                | 0                             | 5                                    | GULF                           |
| Ciudad de México    | Tláhuac                        | 323771           | 30.6                         | 10584              | 3                  | 214678                                | 0.663                                        | 0.702                                         | 2                                | 1                             | 0                                    | GULF                           |
| Ciudad de México    | Tlalpan                        | 599935           | 73.8                         | 8130               | 5                  | 7837                                  | 0.013                                        | 0.011                                         | 4                                | 0                             | 1                                    | GULF                           |

| ENTITY NAME      | CITY NAME                  | TOTAL<br>POPULA-<br>TION | CITY<br>AREA<br>(Km <sup>2</sup> ) | POPULA-<br>TION<br>DENSITY | BLUE<br>SPACES<br>NUMBER | BLUE<br>SPACES<br>SURFACE<br>(m2) | m <sup>2</sup> OF BLUE<br>SPACES<br>PER<br>INHABITANT | BLUE<br>SPACES'<br>SURFACE<br>PERCENT<br>OF THE CITY<br>AREA | NUMBER OF<br>ARTIFICIAL<br>BLUE<br>SPACES | NUMBER<br>OF<br>NATURAL<br>BLUE<br>SPACES | NUMBER OF<br>NOT<br>IDENTIFIED<br>BLUE<br>SPACES | SIMPLIFIED<br>HYDROLOGI-<br>CAL REGION |
|------------------|----------------------------|--------------------------|------------------------------------|----------------------------|--------------------------|-----------------------------------|-------------------------------------------------------|--------------------------------------------------------------|-------------------------------------------|-------------------------------------------|--------------------------------------------------|----------------------------------------|
| Ciudad de México | Xochimilco                 | 429481                   | 64.0                               | 6713                       | 21                       | 1798755                           | 4.188                                                 | 2.812                                                        | 4                                         | 2                                         | 15                                               | GULF                                   |
| Ciudad de México | Benito Juárez              | 434153                   | 26.5                               | 16353                      | 0                        | 0                                 | 0                                                     | 0.000                                                        | 0                                         | 0                                         | 0                                                | GULF                                   |
| Ciudad de México | Cuauhtémoc                 | 545884                   | 32.3                               | 16882                      | 1                        | 1477                              | 0.003                                                 | 0.005                                                        | 1                                         | 0                                         | 0                                                | GULF                                   |
| Ciudad de México | Miguel Hidalgo             | 414470                   | 46.2                               | 8980                       | 8                        | 196981                            | 0.475                                                 | 0.427                                                        | 8                                         | 0                                         | 0                                                | GULF                                   |
| Ciudad de México | Venustiano Carranza        | 443704                   | 33.7                               | 13180                      | 1                        | 77715                             | 0.175                                                 | 0.231                                                        | 1                                         | 0                                         | 0                                                | GULF                                   |
| Durango          | Victoria de Durango        | 616068                   | 113.4                              | 5435                       | 22                       | 93419                             | 0.152                                                 | 0.082                                                        | 21                                        | 0                                         | 1                                                | PACIFICO                               |
| Durango          | Gómez Palacio              | 301742                   | 61.5                               | 4910                       | 12                       | 24114                             | 0.08                                                  | 0.039                                                        | 11                                        | 0                                         | 1                                                | NORTH                                  |
| Guanajuato       | Celaya                     | 378143                   | 64.8                               | 5839                       | 10                       | 48305                             | 0.128                                                 | 0.075                                                        | 9                                         | 0                                         | 1                                                | CENTER                                 |
| Guanajuato       | Irapuato                   | 452090                   | 69.1                               | 6543                       | 8                        | 72427                             | 0.16                                                  | 0.105                                                        | 6                                         | 0                                         | 2                                                | CENTER                                 |
| Guanajuato       | León de los Aldama         | 1579803                  | 216.4                              | 7302                       | 64                       | 3148964                           | 1.993                                                 | 1.455                                                        | 55                                        | 0                                         | 9                                                | CENTER                                 |
| Guanajuato       | Salamanca                  | 160682                   | 35.8                               | 4486                       | 17                       | 38015                             | 0.237                                                 | 0.106                                                        | 4                                         | 0                                         | 13                                               | CENTER                                 |
| Guerrero         | Acapulco de Juárez         | 658609                   | 143.0                              | 4606                       | 49                       | 295906                            | 0.449                                                 | 0.207                                                        | 43                                        | 1                                         | 5                                                | PACIFICO                               |
| Guerrero         | Chilpancingo de los Bravo  | 225728                   | 35.4                               | 6382                       | 2                        | 207                               | 0.001                                                 | 0.001                                                        | 2                                         | 0                                         | 0                                                | PACIFICO                               |
| Guerrero         | Iguala de la Independencia | 132854                   | 31.4                               | 4227                       | 2                        | 7150                              | 0.054                                                 | 0.023                                                        | 0                                         | 0                                         | 2                                                | CENTER                                 |
| Hidalgo          | Pachuca de Soto            | 297848                   | 67.1                               | 4442                       | 18                       | 34415                             | 0.116                                                 | 0.051                                                        | 18                                        | 0                                         | 0                                                | GULF                                   |
| Hidalgo          | Tulancingo                 | 106163                   | 22.9                               | 4635                       | 3                        | 488                               | 0.005                                                 | 0.002                                                        | 2                                         | 0                                         | 1                                                | GULF                                   |
| Jalisco          | Ciudad Guzmán              | 111975                   | 18.2                               | 6154                       | 1                        | 154                               | 0.001                                                 | 0.001                                                        | 1                                         | 0                                         | 0                                                | CENTER                                 |
| Jalisco          | Guadalajara                | 1385621                  | 141.2                              | 9813                       | 36                       | 130987                            | 0.095                                                 | 0.093                                                        | 34                                        | 0                                         | 2                                                | CENTER                                 |
| Jalisco          | Lagos de Moreno            | 111569                   | 24.5                               | 4556                       | 15                       | 25474                             | 0.228                                                 | 0.104                                                        | 0                                         | 0                                         | 15                                               | CENTER                                 |
| Jalisco          | Puerto Vallarta            | 224166                   | 48.7                               | 4604                       | 20                       | 44178                             | 0.197                                                 | 0.091                                                        | 14                                        | 0                                         | 6                                                | PACIFICO                               |
| Jalisco          | Hacienda Santa Fe          | 139174                   | 9.3                                | 15027                      | 0                        | 0                                 | 0                                                     | 0.000                                                        | 0                                         | 0                                         | 0                                                | CENTER                                 |
| Jalisco          | Tlaquepaque                | 650123                   | 81.4                               | 7991                       | 16                       | 432296                            | 0.665                                                 | 0.531                                                        | 10                                        | 0                                         | 6                                                | CENTER                                 |
| Jalisco          | Tonalá                     | 442440                   | 51.2                               | 8637                       | 13                       | 10151                             | 0.023                                                 | 0.020                                                        | 9                                         | 0                                         | 4                                                | CENTER                                 |
| Jalisco          | Zapopan                    | 1257547                  | 189.4                              | 6640                       | 43                       | 274531                            | 0.218                                                 | 0.145                                                        | 43                                        | 0                                         | 0                                                | CENTER                                 |
| México           | Tepexpan                   | 120778                   | 19.9                               | 6075                       | 1                        | 1890                              | 0.016                                                 | 0.010                                                        | 1                                         | 0                                         | 0                                                | GULF                                   |
| México           | Ciudad López Mateos        | 523065                   | 75.0                               | 6971                       | 18                       | 769801                            | 1.472                                                 | 1.026                                                        | 17                                        | 0                                         | 1                                                | GULF                                   |
| México           | San Francisco Coacalco     | 293245                   | 21.9                               | 13363                      | 1                        | 2171                              | 0.007                                                 | 0.010                                                        | 1                                         | 0                                         | 0                                                | GULF                                   |
| México           | Cuautitlán                 | 117995                   | 12.4                               | 9493                       | 1                        | 1285                              | 0.011                                                 | 0.010                                                        | 1                                         | 0                                         | 0                                                | GULF                                   |
| México           | Chalco de Díaz Covarrubias | 174704                   | 18.0                               | 9683                       | 1                        | 5562                              | 0.032                                                 | 0.031                                                        | 1                                         | 0                                         | 0                                                | GULF                                   |
| México           | Chicoloapan de Juárez      | 193532                   | 14.0                               | 13796                      | 0                        | 0                                 | 0                                                     | 0.000                                                        | 0                                         | 0                                         | 0                                                | GULF                                   |
| México           | Chimalhuacán               | 703215                   | 48.3                               | 14571                      | 1                        | 10418                             | 0.015                                                 | 0.022                                                        | 1                                         | 0                                         | 0                                                | GULF                                   |
| México           | Ecatepec de Morelos        | 1643623                  | 128.8                              | 12764                      | 2                        | 2879                              | 0.002                                                 | 0.002                                                        | 2                                         | 0                                         | 0                                                | GULF                                   |
| México           | Naucalpan de Juárez        | 134948                   | 22.0                               | 6143                       | 9                        | 25544                             | 0.189                                                 | 0.116                                                        | 9                                         | 0                                         | 0                                                | GULF                                   |
| México           | Ixtapaluca                 | 368585                   | 38.3                               | 9618                       | 6                        | 6478                              | 0.018                                                 | 0.017                                                        | 6                                         | 0                                         | 0                                                | GULF                                   |
| México           | Naucalpan de Juárez        | 776220                   | 76.0                               | 10214                      | 12                       | 140714                            | 0.181                                                 | 0.185                                                        | 7                                         | 0                                         | 5                                                | GULF                                   |
| México           | Ciudad Nezahualcóyotl      | 1072676                  | 51.3                               | 20890                      | 1                        | 8371                              | 0.008                                                 | 0.016                                                        | 1                                         | 0                                         | 0                                                | GULF                                   |
| México           | Ciudad Nicolás Romero      | 323545                   | 36.5                               | 8858                       | 9                        | 281307                            | 0.869                                                 | 0.770                                                        | 4                                         | 2                                         | 3                                                | GULF                                   |
| México           | Ojo de Agua                | 386290                   | 36.9                               | 10481                      | 1                        | 239                               | 0.001                                                 | 0.001                                                        | 1                                         | 0                                         | 0                                                | GULF                                   |
| México           | Tlalnepantla               | 658907                   | 69.2                               | 9516                       | 6                        | 134664                            | 0.204                                                 | 0.194                                                        | 6                                         | 0                                         | 0                                                | GULF                                   |

| ENTITY NAME     | CITY NAME                     | TOTAL POPULATION | CITY AREA (Km <sup>2</sup> ) | POPULATION DENSITY | BLUE SPACES NUMBER | BLUE SPACES SURFACE (m2) | m <sup>2</sup> OF BLUE SPACES PER INHABITANT | BLUE SPACES' SURFACE PERCENT OF THE CITY AREA | NUMBER OF ARTIFICIAL BLUE SPACES | NUMBER OF NATURAL BLUE SPACES | NUMBER OF NOT IDENTIFIED BLUE SPACES | SIMPLIFIED HYDROLOGICAL REGION |
|-----------------|-------------------------------|------------------|------------------------------|--------------------|--------------------|--------------------------|----------------------------------------------|-----------------------------------------------|----------------------------------|-------------------------------|--------------------------------------|--------------------------------|
| México          | Toluca de Lerdo               | 223876           | 29.6                         | 7555               | 2                  | 4706                     | 0.021                                        | 0.016                                         | 2                                | 0                             | 0                                    | CENTER                         |
| México          | Buenavista                    | 216776           | 20.0                         | 10816              | 9                  | 3560                     | 0.016                                        | 0.018                                         | 9                                | 0                             | 0                                    | GULF                           |
| México          | San Pablo de las Salinas      | 157998           | 10.6                         | 14895              | 0                  | 0                        | 0                                            | 0.000                                         | 0                                | 0                             | 0                                    | GULF                           |
| México          | Cuautitlán Izcalli            | 515353           | 85.6                         | 6019               | 18                 | 602926                   | 1.17                                         | 0.704                                         | 8                                | 1                             | 9                                    | GULF                           |
| México          | Xico                          | 384327           | 27.5                         | 13961              | 1                  | 33644                    | 0.088                                        | 0.122                                         | 1                                | 0                             | 0                                    | GULF                           |
| Michoacán       | Apatzingán de la Constitución | 102362           | 23.7                         | 4320               | 0                  | 0                        | 0                                            | 0.000                                         | 0                                | 0                             | 0                                    | CENTER                         |
| Michoacán       | Morelia                       | 743275           | 122.9                        | 6049               | 24                 | 83032                    | 0.112                                        | 0.068                                         | 20                               | 0                             | 4                                    | CENTER                         |
| Michoacán       | Uruapan                       | 299523           | 45.0                         | 6653               | 5                  | 55477                    | 0.185                                        | 0.123                                         | 3                                | 0                             | 2                                    | CENTER                         |
| Michoacán       | Zamora de Hidalgo             | 154546           | 20.5                         | 7555               | 4                  | 3883                     | 0.025                                        | 0.019                                         | 4                                | 0                             | 0                                    | CENTER                         |
| Morelos         | Cuautla                       | 157336           | 35.1                         | 4477               | 29                 | 15801                    | 0.1                                          | 0.045                                         | 22                               | 0                             | 7                                    | CENTER                         |
| Morelos         | Cuernavaca                    | 341029           | 74.2                         | 4593               | 8                  | 19590                    | 0.057                                        | 0.026                                         | 7                                | 1                             | 0                                    | CENTER                         |
| Morelos         | Jiutepec                      | 174629           | 32.0                         | 5453               | 68                 | 62094                    | 0.356                                        | 0.194                                         | 61                               | 0                             | 7                                    | CENTER                         |
| Morelos         | Temixco                       | 104461           | 23.5                         | 4436               | 12                 | 4253                     | 0.041                                        | 0.018                                         | 12                               | 0                             | 0                                    | CENTER                         |
| Nayarit         | Tepic                         | 371387           | 53.7                         | 6921               | 5                  | 16652                    | 0.045                                        | 0.031                                         | 3                                | 0                             | 2                                    | CENTER                         |
| Nuevo León      | Ciudad Apodaca                | 536436           | 88.4                         | 6071               | 6                  | 31997                    | 0.06                                         | 0.036                                         | 3                                | 0                             | 3                                    | NORTH                          |
| Nuevo León      | García                        | 234698           | 25.7                         | 9118               | 2                  | 9296                     | 0.04                                         | 0.036                                         | 2                                | 0                             | 0                                    | NORTH                          |
| Nuevo León      | San Pedro Garza García        | 132128           | 47.0                         | 2811               | 13                 | 26000                    | 0.197                                        | 0.055                                         | 12                               | 0                             | 1                                    | NORTH                          |
| Nuevo León      | Ciudad General Escobedo       | 454967           | 70.2                         | 6481               | 5                  | 2825                     | 0.006                                        | 0.004                                         | 5                                | 0                             | 0                                    | NORTH                          |
| Nuevo León      | Guadalupe                     | 635862           | 94.3                         | 6746               | 9                  | 2991                     | 0.005                                        | 0.003                                         | 9                                | 0                             | 0                                    | NORTH                          |
| Nuevo León      | Ciudad Benito Juárez          | 308285           | 38.9                         | 7915               | 1                  | 1152                     | 0.004                                        | 0.003                                         | 0                                | 0                             | 1                                    | NORTH                          |
| Nuevo León      | Monterrey                     | 1142952          | 216.8                        | 5271               | 28                 | 157875                   | 0.138                                        | 0.073                                         | 27                               | 0                             | 1                                    | NORTH                          |
| Nuevo León      | San Nicolás de los Garza      | 412199           | 59.6                         | 6919               | 9                  | 14067                    | 0.034                                        | 0.024                                         | 9                                | 0                             | 0                                    | NORTH                          |
| Nuevo León      | Ciudad Santa Catarina         | 304052           | 46.1                         | 6589               | 0                  | 0                        | 0                                            | 0.000                                         | 0                                | 0                             | 0                                    | NORTH                          |
| Oaxaca          | Oaxaca de Juárez              | 258913           | 46.3                         | 5588               | 2                  | 928                      | 0.004                                        | 0.002                                         | 2                                | 0                             | 0                                    | PACIFICO                       |
| Oaxaca          | San Juan Bautista Tuxtepec    | 103609           | 41.8                         | 2477               | 15                 | 36366                    | 0.351                                        | 0.087                                         | 1                                | 0                             | 14                                   | GULF                           |
| Puebla          | Heroica Puebla de Zaragoza    | 1542232          | 204.7                        | 7533               | 28                 | 251514                   | 0.163                                        | 0.123                                         | 22                               | 0                             | 6                                    | CENTER                         |
| Puebla          | Cholula de Rivadavia          | 102260           | 29.7                         | 3443               | 5                  | 4398                     | 0.043                                        | 0.015                                         | 4                                | 0                             | 1                                    | CENTER                         |
| Puebla          | Tehuacán                      | 293825           | 50.9                         | 5769               | 13                 | 63345                    | 0.216                                        | 0.124                                         | 12                               | 0                             | 1                                    | GULF                           |
| Querétaro       | El Pueblito                   | 115264           | 28.5                         | 4051               | 22                 | 29038                    | 0.252                                        | 0.102                                         | 19                               | 0                             | 3                                    | CENTER                         |
| Querétaro       | Santiago de Querétaro         | 794789           | 118.7                        | 6698               | 47                 | 256183                   | 0.322                                        | 0.216                                         | 44                               | 0                             | 3                                    | CENTER                         |
| Querétaro       | San Juan del Río              | 177719           | 47.2                         | 3767               | 7                  | 7915                     | 0.045                                        | 0.017                                         | 6                                | 0                             | 1                                    | GULF                           |
| Quintana Roo    | Chetumal                      | 169028           | 35.7                         | 4733               | 6                  | 42407                    | 0.251                                        | 0.119                                         | 2                                | 0                             | 4                                    | YUCATAN                        |
| Quintana Roo    | Cancún                        | 888797           | 141.3                        | 6288               | 29                 | 165647                   | 0.186                                        | 0.117                                         | 20                               | 0                             | 9                                    | YUCATAN                        |
| Quintana Roo    | Playa del Carmen              | 304942           | 49.4                         | 6175               | 20                 | 96013                    | 0.315                                        | 0.194                                         | 17                               | 0                             | 3                                    | YUCATAN                        |
| San Luis Potosí | Ciudad Valles                 | 136351           | 35.8                         | 3811               | 2                  | 1543                     | 0.011                                        | 0.004                                         | 1                                | 0                             | 1                                    | GULF                           |
| San Luis Potosí | San Luis Potosí               | 845941           | 161.7                        | 5232               | 30                 | 184427                   | 0.218                                        | 0.114                                         | 27                               | 0                             | 3                                    | NORTH                          |
| San Luis Potosí | Soledad de Graciano Sánchez   | 310192           | 36.0                         | 8627               | 17                 | 11376                    | 0.037                                        | 0.032                                         | 14                               | 0                             | 3                                    | NORTH                          |
| Sinaloa         | Los Mochis                    | 298009           | 56.7                         | 5259               | 13                 | 30090                    | 0.101                                        | 0.053                                         | 13                               | 0                             | 0                                    | PACIFICO                       |
| Sinaloa         | Culiacán Rosales              | 808416           | 135.8                        | 5954               | 9                  | 27638                    | 0.034                                        | 0.020                                         | 7                                | 0                             | 2                                    | PACIFICO                       |

| ENTITY NAME | CITY NAME             | TOTAL POPULATION | CITY AREA (Km <sup>2</sup> ) | POPULATION DENSITY | BLUE SPACES NUMBER | BLUE SPACES SURFACE (m2) | m <sup>2</sup> OF BLUE SPACES PER INHABITANT | BLUE SPACES' SURFACE PERCENT OF THE CITY AREA | NUMBER OF ARTIFICIAL BLUE SPACES | NUMBER OF NATURAL BLUE SPACES | NUMBER OF NOT IDENTIFIED BLUE SPACES | SIMPLIFIED HYDROLOGICAL REGION |
|-------------|-----------------------|------------------|------------------------------|--------------------|--------------------|--------------------------|----------------------------------------------|-----------------------------------------------|----------------------------------|-------------------------------|--------------------------------------|--------------------------------|
| Sinaloa     | Mazatlán              | 441975           | 81.1                         | 5447               | 42                 | 404584                   | 0.915                                        | 0.499                                         | 25                               | 0                             | 17                                   | PACIFICO                       |
| Sonora      | Ciudad Obregón        | 329404           | 63.6                         | 5180               | 3                  | 215622                   | 0.655                                        | 0.339                                         | 3                                | 0                             | 0                                    | PACIFICO                       |
| Sonora      | Heroica Guaymas       | 117253           | 38.7                         | 3032               | 3                  | 2196                     | 0.019                                        | 0.006                                         | 1                                | 0                             | 2                                    | PACIFICO                       |
| Sonora      | Hermosillo            | 855563           | 199.8                        | 4282               | 37                 | 158022                   | 0.185                                        | 0.079                                         | 24                               | 0                             | 13                                   | PACIFICO                       |
| Sonora      | Navojoa               | 120926           | 40.4                         | 2994               | 2                  | 1905                     | 0.016                                        | 0.005                                         | 2                                | 0                             | 0                                    | PACIFICO                       |
| Sonora      | Heroica Nogales       | 261137           | 52.1                         | 5015               | 1                  | 7181                     | 0.027                                        | 0.014                                         | 0                                | 0                             | 1                                    | PACIFICO                       |
| Sonora      | San Luis Río Colorado | 176685           | 70.5                         | 2505               | 0                  | 0                        | 0                                            | 0.000                                         | 0                                | 0                             | 0                                    | B. CALIFORNIA                  |
| Tabasco     | Villahermosa          | 340060           | 63.2                         | 5377               | 38                 | 2874705                  | 8.454                                        | 4.546                                         | 12                               | 11                            | 15                                   | GULF                           |
| Tamaulipas  | Miramar               | 161820           | 32.6                         | 4959               | 46                 | 1148188                  | 7.095                                        | 3.519                                         | 11                               | 5                             | 30                                   | GULF                           |
| Tamaulipas  | Ciudad Madero         | 205933           | 47.9                         | 4296               | 60                 | 1766848                  | 8.58                                         | 3.686                                         | 13                               | 13                            | 34                                   | GULF                           |
| Tamaulipas  | Heroica Matamoros     | 510739           | 114.2                        | 4473               | 22                 | 557099                   | 1.091                                        | 0.488                                         | 9                                | 0                             | 13                                   | NORTH                          |
| Tamaulipas  | Nuevo Laredo          | 416055           | 123.5                        | 3369               | 31                 | 354290                   | 0.852                                        | 0.287                                         | 12                               | 0                             | 19                                   | NORTH                          |
| Tamaulipas  | Reynosa               | 691557           | 165.2                        | 4186               | 62                 | 1880973                  | 2.72                                         | 1.139                                         | 21                               | 0                             | 41                                   | NORTH                          |
| Tamaulipas  | Ciudad Río Bravo      | 111314           | 28.0                         | 3980               | 11                 | 51857                    | 0.466                                        | 0.185                                         | 7                                | 0                             | 4                                    | NORTH                          |
| Tamaulipas  | Tampico               | 297373           | 54.9                         | 5413               | 11                 | 3922986                  | 13.192                                       | 7.140                                         | 6                                | 2                             | 3                                    | GULF                           |
| Tamaulipas  | Ciudad Victoria       | 332100           | 68.6                         | 4838               | 9                  | 13427                    | 0.04                                         | 0.020                                         | 8                                | 0                             | 1                                    | GULF                           |
| Veracruz    | Veracruz              | 132011           | 18.1                         | 7282               | 1                  | 7002                     | 0.053                                        | 0.039                                         | 0                                | 0                             | 1                                    | GULF                           |
| Veracruz    | Coatzacoalcos         | 212540           | 41.0                         | 5189               | 14                 | 63634                    | 0.299                                        | 0.155                                         | 10                               | 0                             | 4                                    | GULF                           |
| Veracruz    | Córdoba               | 139075           | 24.3                         | 5726               | 2                  | 2159                     | 0.016                                        | 0.009                                         | 1                                | 0                             | 1                                    | GULF                           |
| Veracruz    | Xalapa-Enríquez       | 443063           | 59.7                         | 7423               | 20                 | 134671                   | 0.304                                        | 0.226                                         | 13                               | 0                             | 7                                    | GULF                           |
| Veracruz    | Minatitlán            | 101336           | 33.0                         | 3072               | 27                 | 229135                   | 2.261                                        | 0.695                                         | 7                                | 0                             | 20                                   | GULF                           |
| Veracruz    | Orizaba               | 120500           | 19.2                         | 6279               | 4                  | 15429                    | 0.128                                        | 0.080                                         | 2                                | 0                             | 2                                    | GULF                           |
| Veracruz    | Poza Rica de Hidalgo  | 180057           | 42.0                         | 4289               | 5                  | 58229                    | 0.323                                        | 0.139                                         | 4                                | 0                             | 1                                    | GULF                           |
| Veracruz    | Veracruz              | 405952           | 55.8                         | 7277               | 34                 | 1039010                  | 2.559                                        | 1.863                                         | 1                                | 0                             | 33                                   | GULF                           |
| Yucatán     | Kanasín               | 139753           | 29.0                         | 4817               | 7                  | 18132                    | 0.13                                         | 0.062                                         | 1                                | 0                             | 6                                    | YUCATAN                        |
| Yucatán     | Mérida                | 921771           | 234.9                        | 3924               | 26                 | 158479                   | 0.172                                        | 0.067                                         | 15                               | 0                             | 11                                   | YUCATAN                        |
| Zacatecas   | Fresnillo             | 143281           | 28.8                         | 4975               | 11                 | 13572                    | 0.095                                        | 0.047                                         | 11                               | 0                             | 0                                    | NORTH                          |
| Zacatecas   | Guadalupe             | 170029           | 26.3                         | 6472               | 2                  | 2069                     | 0.012                                        | 0.008                                         | 2                                | 0                             | 0                                    | NORTH                          |
| Zacatecas   | Zacatecas             | 138444           | 27.3                         | 5064               | 5                  | 38695                    | 0.279                                        | 0.142                                         | 5                                | 0                             | 0                                    | NORTH                          |
